# Supplementary material
Source: Springer Nature journal article supplement (https://www.springermedizin.de/resource/supplementary/12936_2012_2627_MOESM2_ESM.pdf/9542834)

**Males**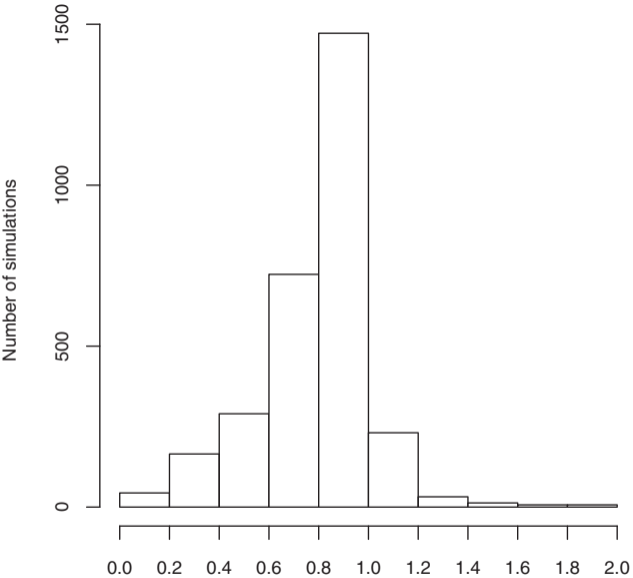**Females**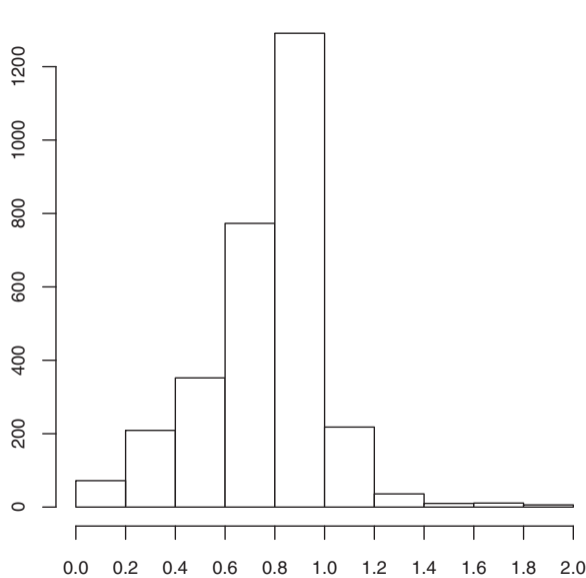

$$y = \frac{p_{10|k=0}}{p_{10|k=1}}$$

Supplement: MOESM2 [file 9542834]
